# Supplementary material for: Identification of cathode stability in Li–CO2batteries with Cu nanoparticles highly dispersed on N-doped graphene
Source: Royal Society of Chemistry journal article supplement (doi:10.1039/c7ta10497a), 2018-01-01
Supplement: c7ta10497a1.pdf [file c7ta10497a1.pdf]

## Electronic Supplementary Information

### **Identification of cathode stability in Li-CO<sub>2</sub> batteries with Cu nanoparticles highly dispersed onto N-doped graphene**

Zhang Zhang<sup>a\*</sup>, Zongwen Zhang<sup>a</sup>, Peifang Liu<sup>a</sup>, Kangzhe Cao<sup>a</sup>, Zhen Zhou<sup>b\*</sup>

*Materials Preparation:* All the reagents were analytical grade without further purification. Few-layered graphene was purchased from Nanjing XFNANO Materials Tech Co.,Ltd. In a typical synthesis process, 0.1907 g Cu(CH<sub>3</sub>COO)<sub>2</sub>·H<sub>2</sub>O, 30 mg graphene, and 0.7628 g urea were mixed with 35 mL ethylene glycol (EG) through intense agitation for 1 h, and ultrasonically treated for 1 h homogeneously. Next, the mixed solution was transferred into 50 mL Teflon-lined stainless steel autoclave and kept at 200 °C for 1 h. After cooling down, the mixture was washed with ethanol for six times, and dried at 60 °C in a vacuum oven. The Cu-NG composite was obtained by annealing the above mixture at 600 °C in an Ar/H<sub>2</sub> atmosphere (volume ratio=9:1) for 8 h. Individual N-doped graphene was prepared without adding Cu(CH<sub>3</sub>COO)<sub>2</sub>·H<sub>2</sub>O at the same conditions for comparison.

*Materials Characterization:* X-ray diffraction (XRD) patterns were recorded on a Rigaku MiniFlex-600 X-ray diffractometer with Cu K $\alpha$  radiation ( $\lambda$ =1.5406 Å). Scanning electron microscopy (SEM) images were recorded on a Hitachi S-4800 field-emission scanning electron microscope equipped with an energy-dispersive spectrometer (EDS). Transmission electron microscopy (TEM) images and high-resolution TEM (HRTEM) images were obtained on a FEI Tecnai G2 F20 electron microscope operated at 200 kV. Fourier-transform infrared (FTIR)

spectroscopy was conducted on a NicoletMAGNA-560 FTIR spectrometer with KBr pellets. X-ray photoelectron spectroscopy (XPS) measurements were performed with a Thermo Scientific ESCALAB 250Xi X-ray Photoelectron Spectrometer. Thermogravimetric-differential thermal analysis was performed on a Rigaku PTC-10 A TG-DTA analyzer.  $^1\text{H}$  nuclear magnetic resonance (NMR) spectroscopy was recorded on a Bruker AV400 spectrometer. A Vario EL CUBE elemental analyzer was used to quantitatively confirm the contents of C and N. AFM was performed on a Dimension Icon instrument.

*Electrochemical Tests:* The electrochemical behaviors were measured in Swagelok cells with a  $1.0\text{ cm}^2$  hole placed on the cathode which enabled  $\text{CO}_2$  to flow in. The cells were assembled in a glove box filled with high-purity argon ( $\text{O}_2$  and  $\text{H}_2\text{O}$  < 1 ppm). To prepare the cathodes, a slurry was obtained by mixing graphene and polyvinylidene fluoride (PVDF) in a mass ratio of 9:1. The slurry was uniformly deposited onto a circular piece of carbon paper (12 mm, 0.3–0.5 mg), and then dried in an oven at  $80^\circ\text{C}$ . Li foil (14 mm) was used as the anode, and polytetrafluorethyylene (PTFE) membrane (18 mm) was used as the separator. The electrolyte was  $1\text{ mol L}^{-1}$  lithium bis (trifluoromethanesulfonyl) imide (LiTFSI) dissolved in tetraethylene glycol dimethyl ether (TEGDME). Discharge/charge tests were conducted on a LAND-CT2001A tester, and the cells were discharged to 2.2 V and then recharged to 4.5 V. Cyclic tests were controlled with a cut-off capacity of 1000 mAh/g at a current density of 200 mA/g and 400 mA/g (i.e., the cells were discharged and charged for 5 h and 2.5 h, respectively).

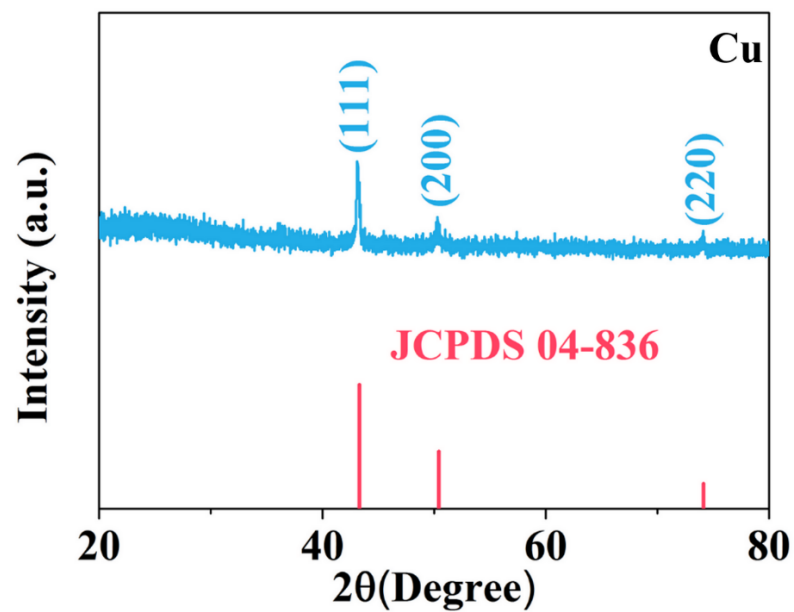

Fig. S1. XRD pattern of Cu-NG composite.

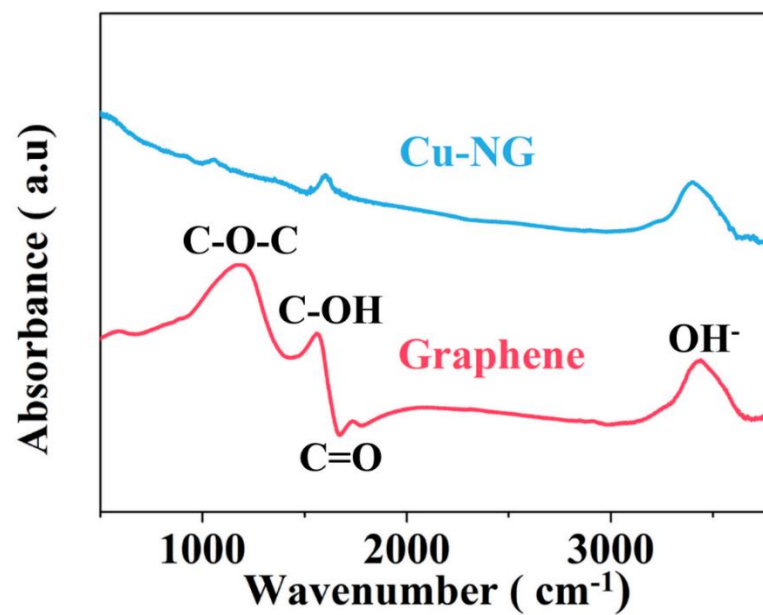

Fig. S2. FTIR spectra of the Cu-NG.

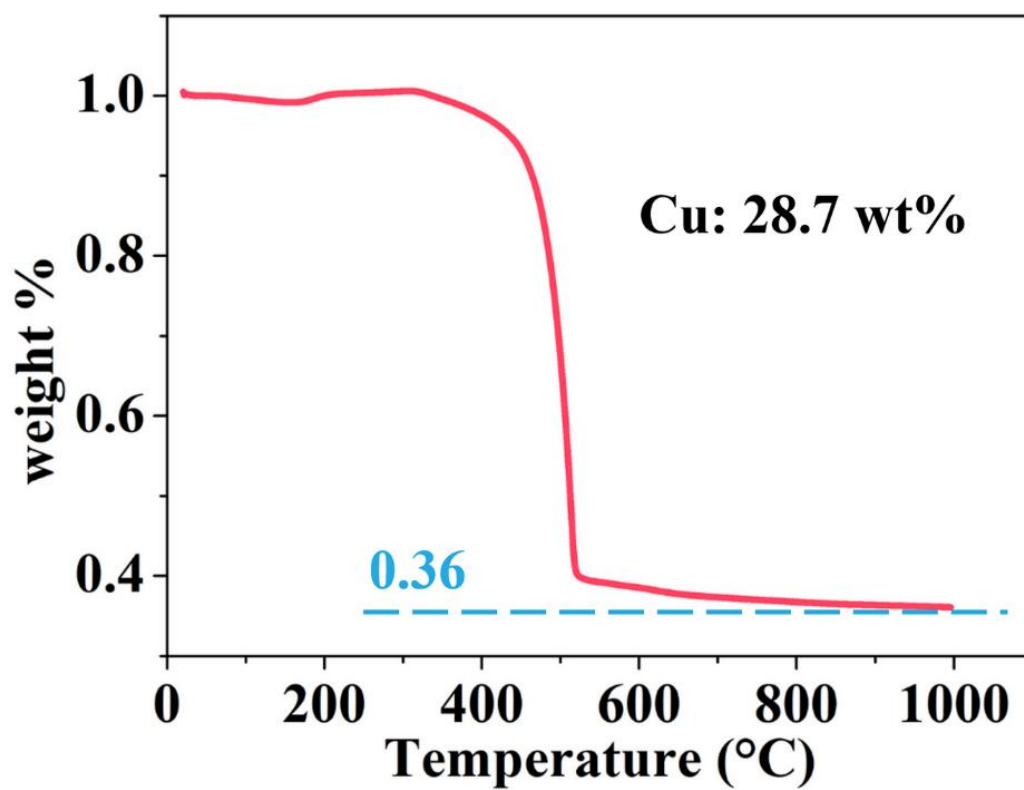

**Fig. S3.** TG-DTA curve of Cu-NG.

| Element | C        | N        |
|---------|----------|----------|
| Amount  | 65.3 wt% | 1.36 wt% |

**Table S1.** Element analysis of Cu-NG.

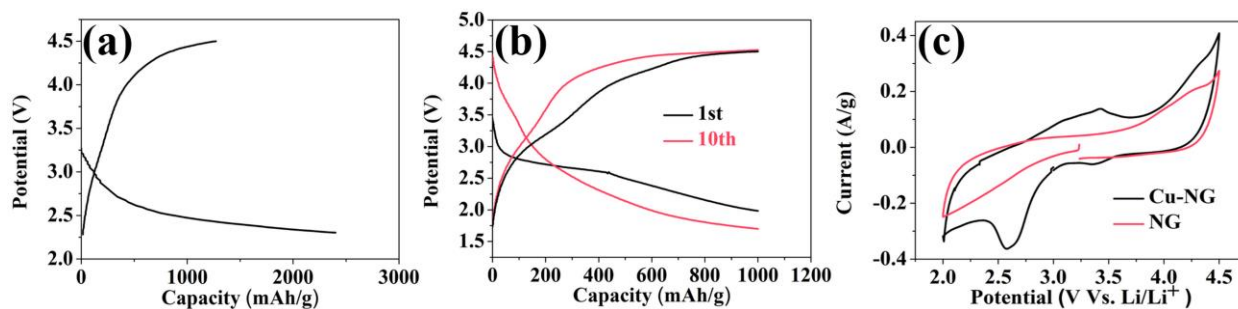

**Fig. S4** (a) The discharge-charge profiles of NG cathodes at current densities of 200 mA g<sup>-1</sup>. (b) Curtailing capacity of 1000 mA h g<sup>-1</sup> at a current density of 200 mA g<sup>-1</sup>. (c) CV curves of Li-CO<sub>2</sub> batteries with NG or Cu-NG cathodes at a scan rate of 0.2 mV s<sup>-1</sup>.

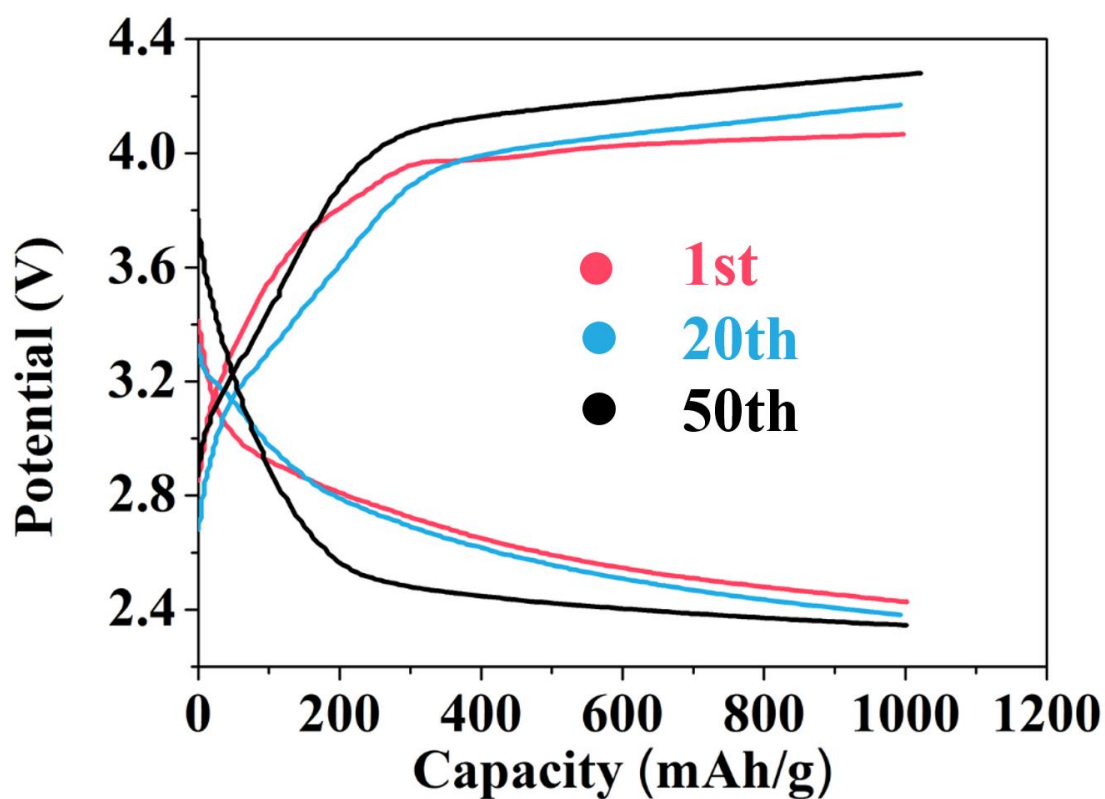

**Fig. S5.** Curtailing capacity of 1000 mA h g<sup>-1</sup> at a current density of 400 mA g<sup>-1</sup>.

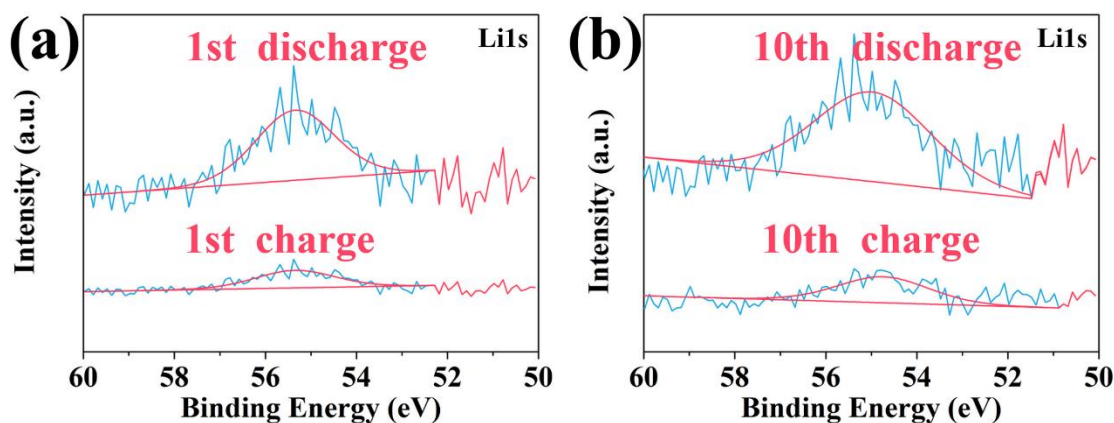

**Fig. S6.** Li1s XPS of the cathode after (a) 1st, (b) 10th discharge-charge process.

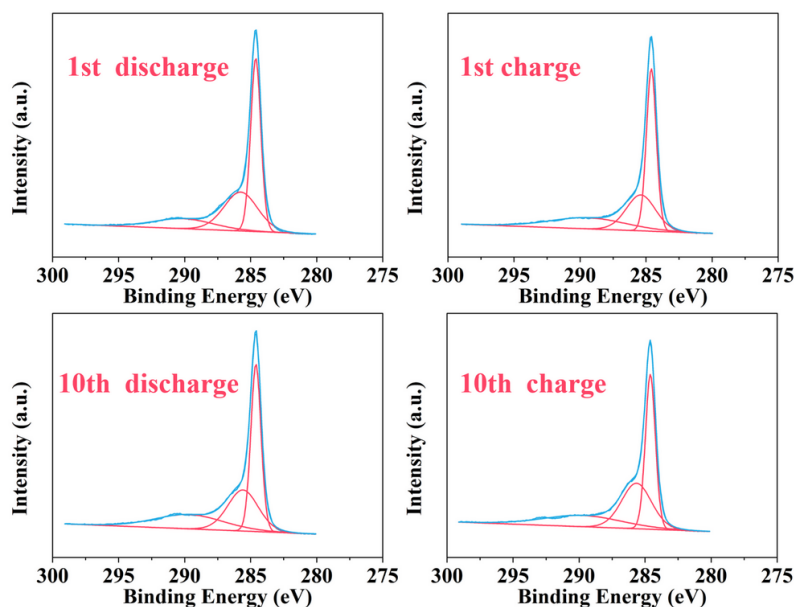

| Area%                 | C=C          | C-O          | C=O          |
|-----------------------|--------------|--------------|--------------|
| <b>Initial state</b>  | <b>42.62</b> | <b>30.85</b> | <b>26.53</b> |
| <b>1st discharge</b>  | <b>45.00</b> | <b>38.73</b> | <b>16.28</b> |
| <b>1st charge</b>     | <b>45.86</b> | <b>30.03</b> | <b>24.11</b> |
| <b>10th discharge</b> | <b>43.21</b> | <b>31.89</b> | <b>24.9</b>  |
| <b>10th charge</b>    | <b>42.68</b> | <b>33.88</b> | <b>24.43</b> |

**Fig. S7.** C1s XPS of the cathode after discharge-charge process and corresponding area proportion of characteristic peaks .

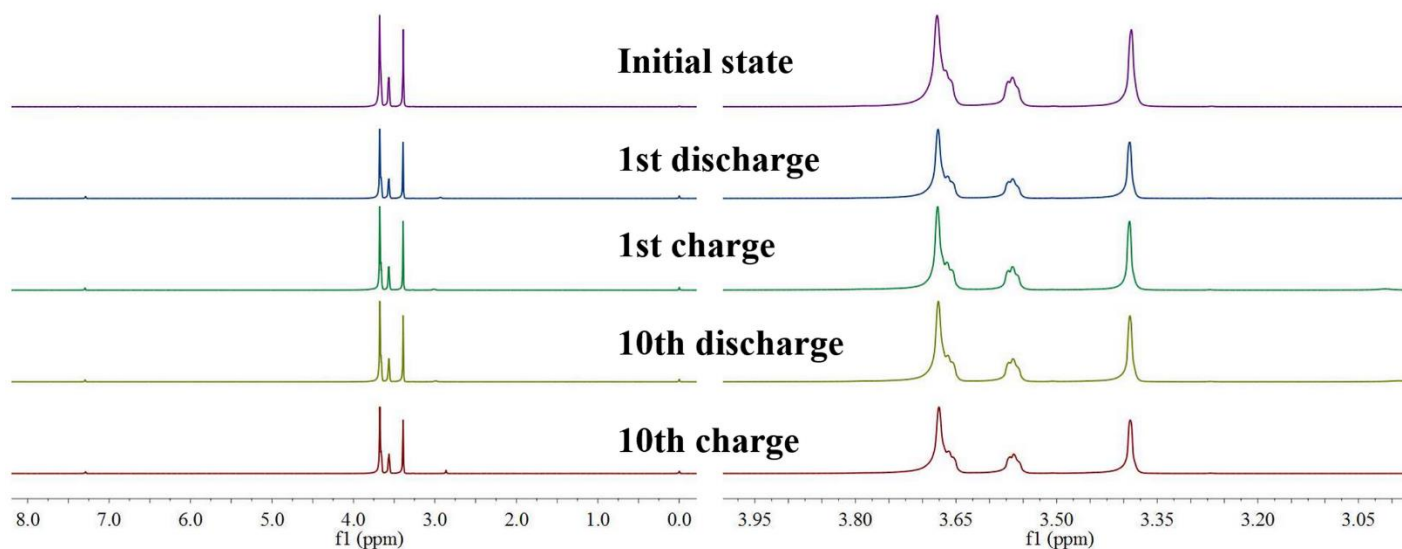

**Fig. S8.**  $^1\text{H}$  NMR analysis of electrolyte after each cycle.

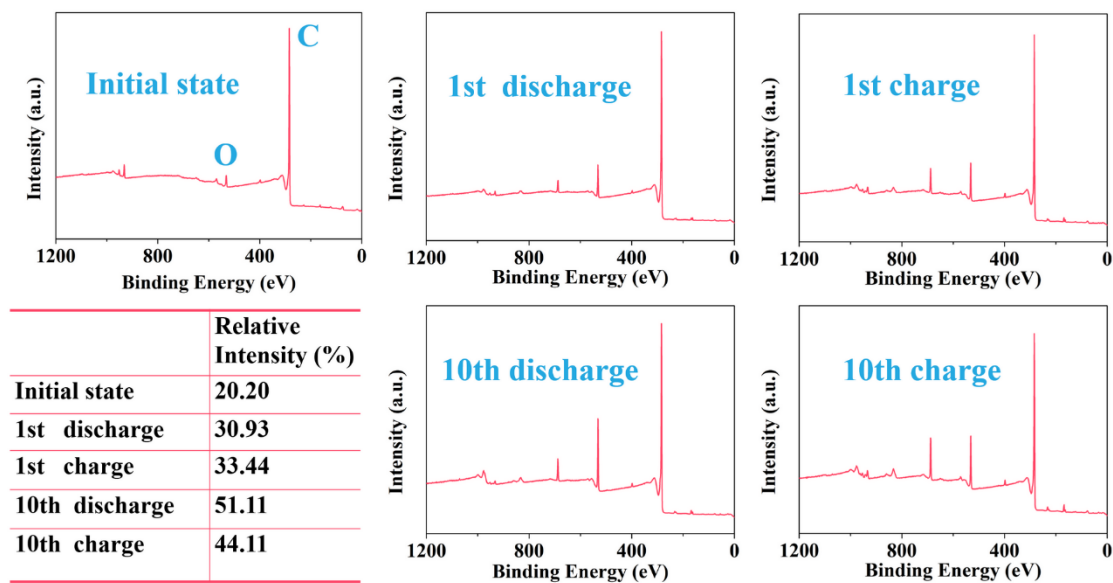

**Fig. S9.** XPS survey spectrum of Cu-NG and relative intensity of C/O content.

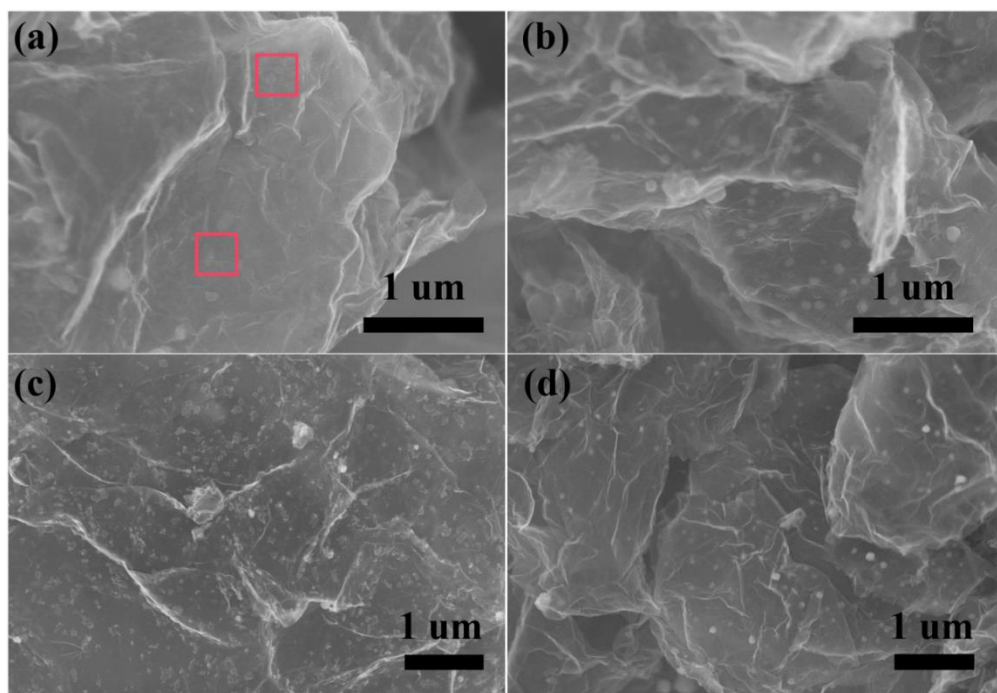

**Fig. S10.** SEM images of (a) 1st discharge. The mark place represents  $\text{Li}_2\text{CO}_3$ . (b) 1st charge. (c) 10th discharge. (d) 10th charge.

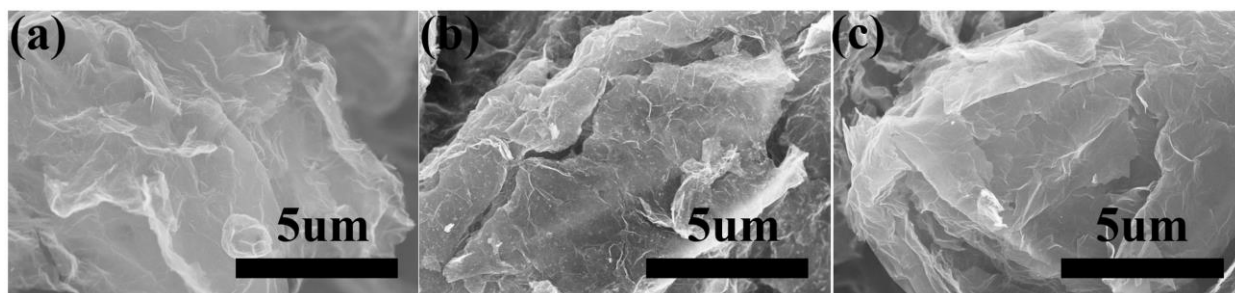

**Fig. S11** (a) SEM image of NG. SEM images of the NG cathode after (b) 1st discharge, (c) 1st charge.

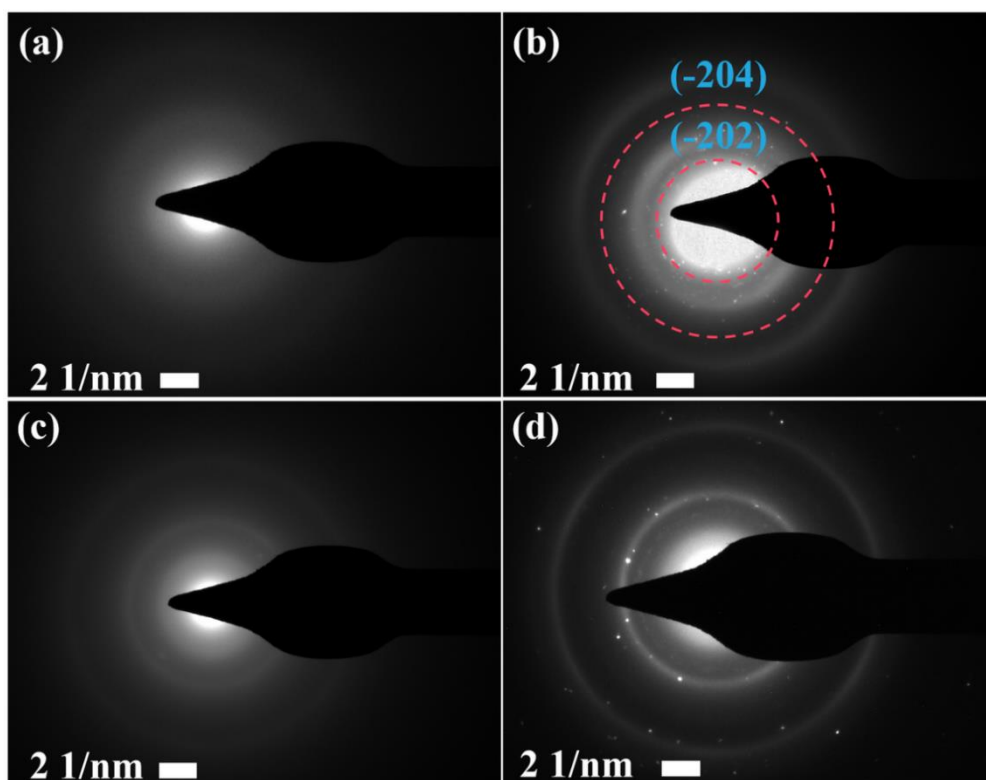

**Fig. S12.** SAED patterns of Cu-NG in different regions after the discharge process (a) and (b). SAED image of Cu-NG after the charge process (c) and (d).

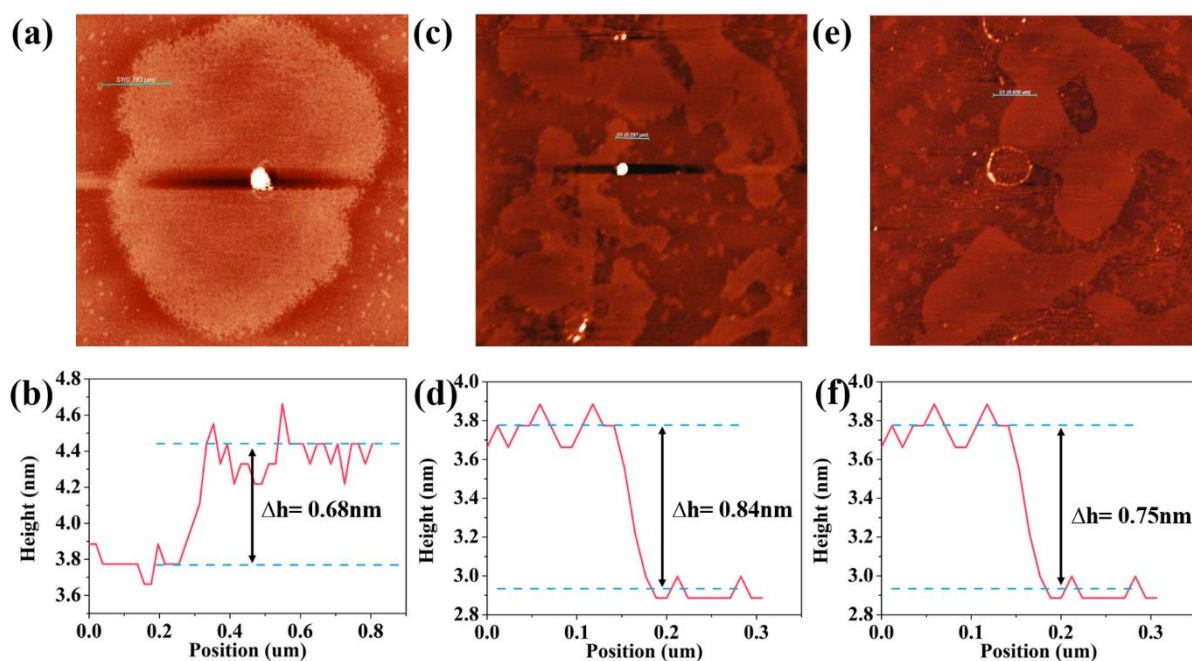

**Fig. S13.** AFM images of Cu-NG cathode (a, b) pristine state. (c, d) After 10th discharge cycle. (e, f) After 10th charge cycle.
